# Supplementary material for: Evaluation of ToF-SIMS imaging for semi-quantitative mapping of BODIPY-labeled fibronectin surface gradients
Source: Royal Society of Chemistry journal article supplement (doi:10.1039/d5an00962f), 2026-01-01

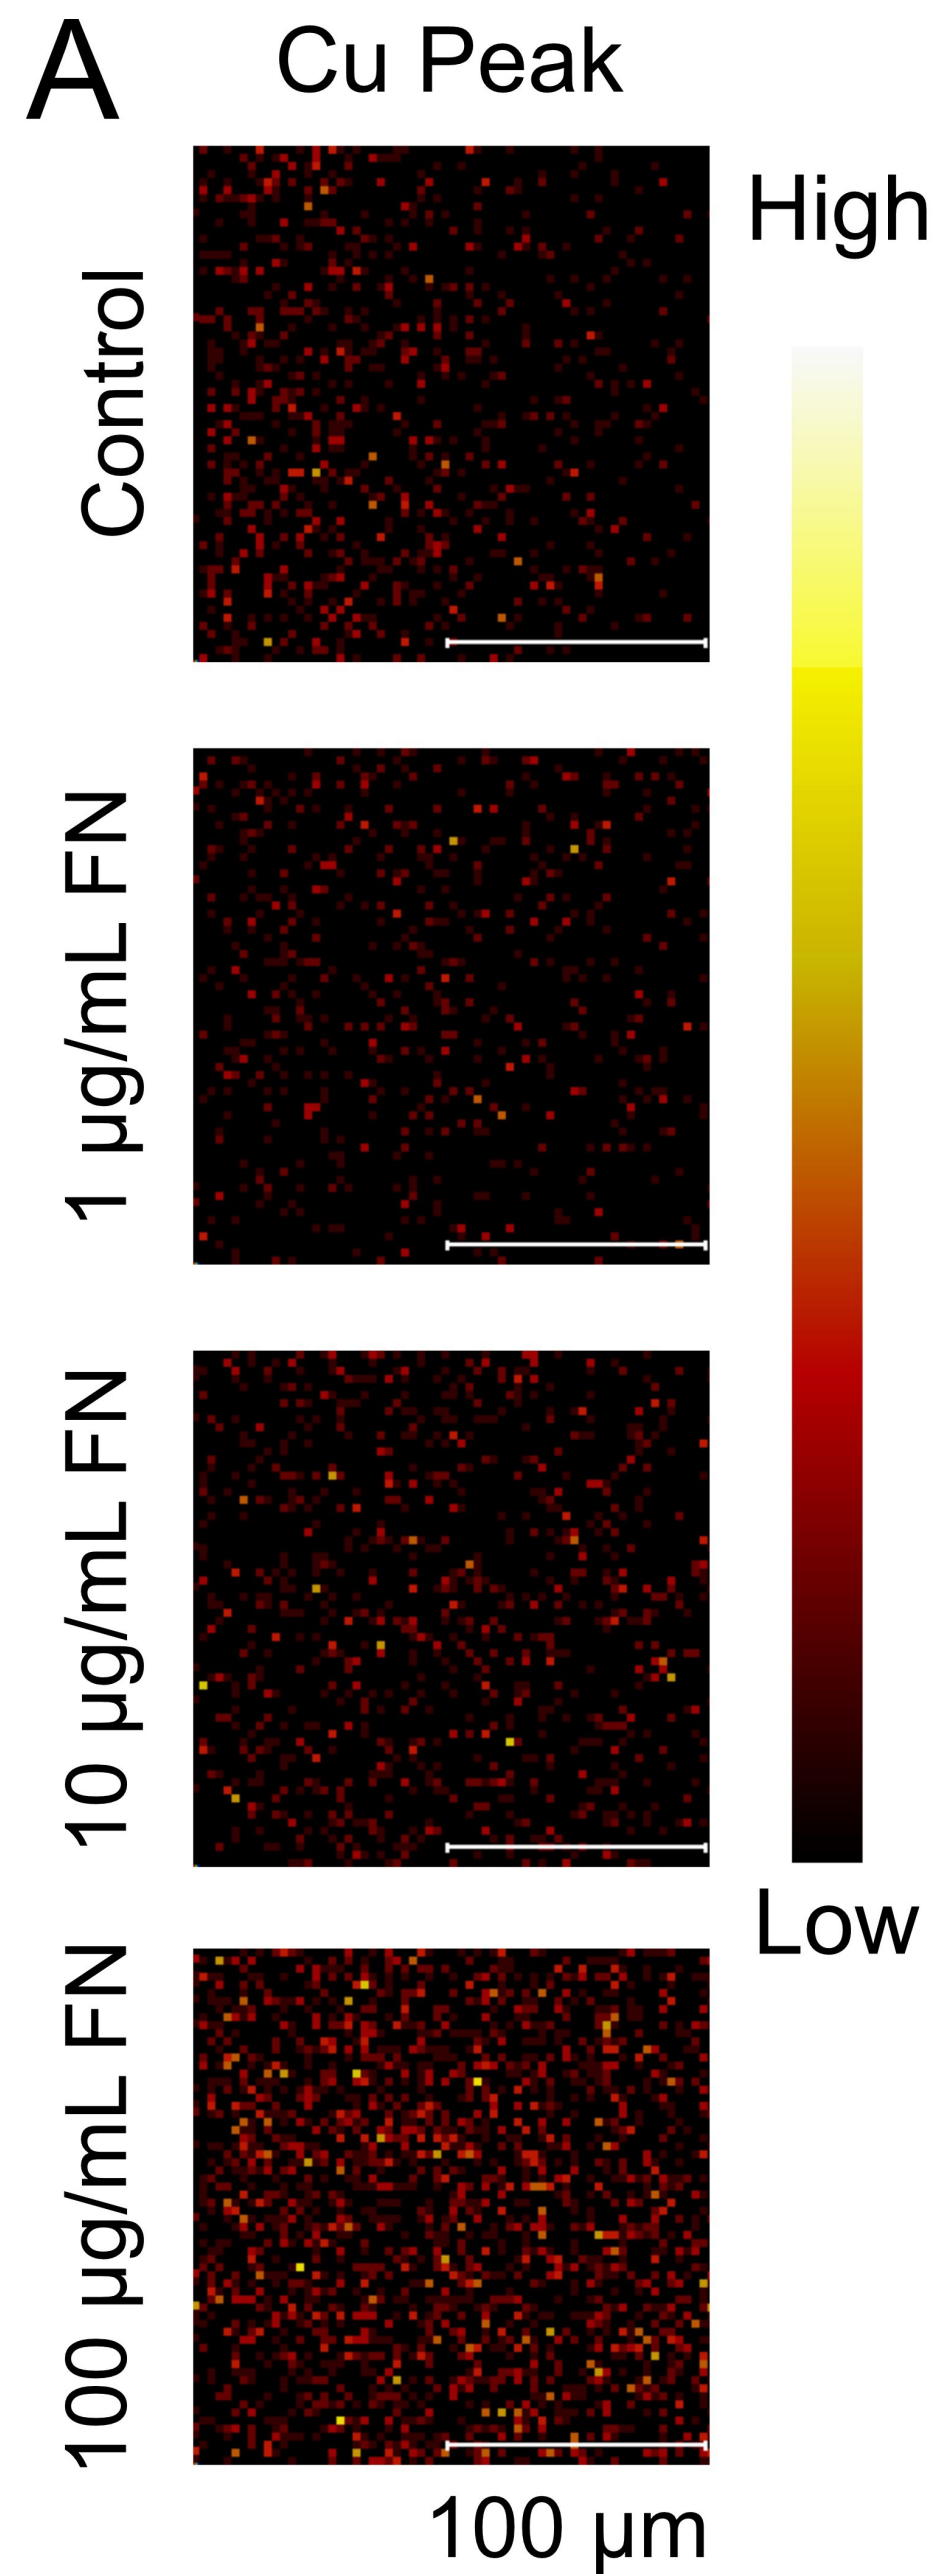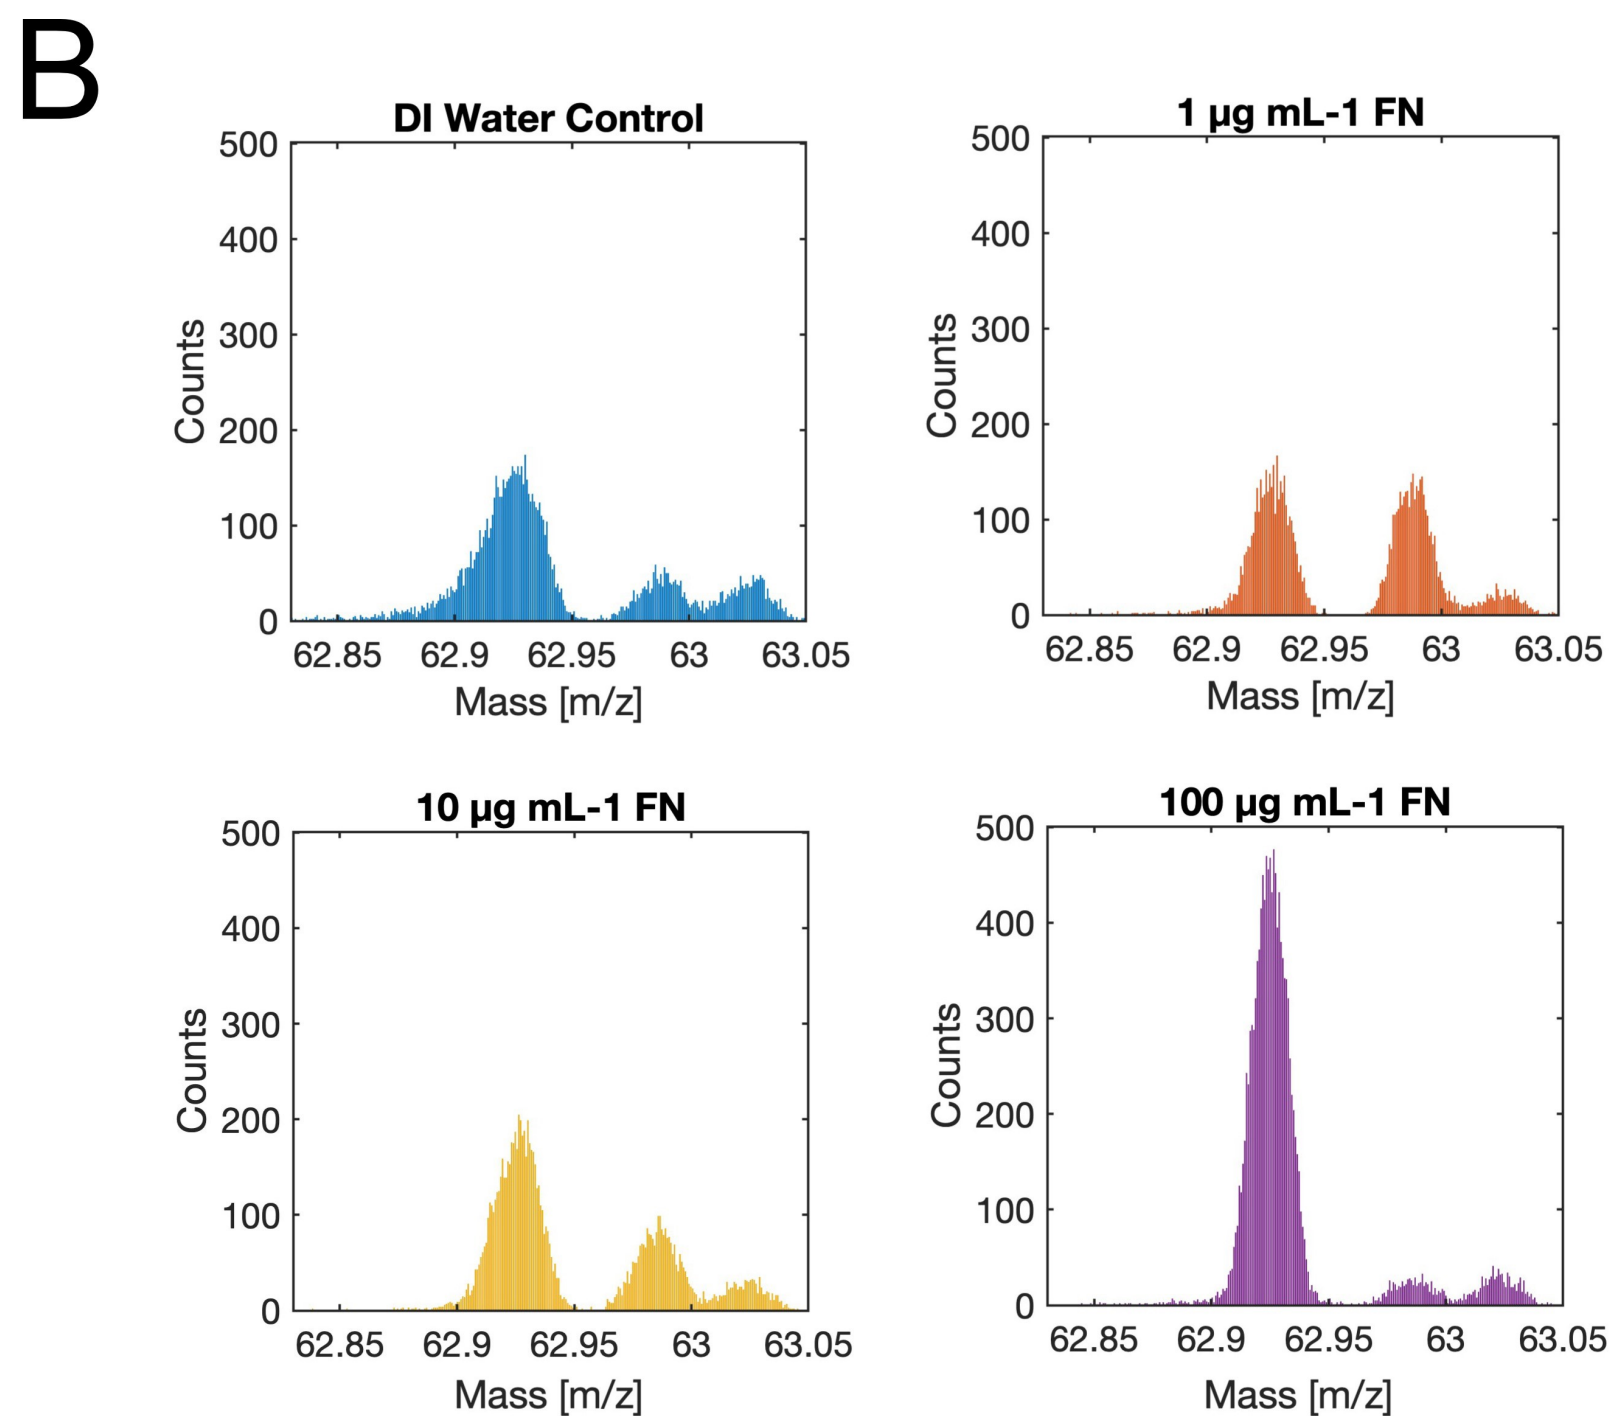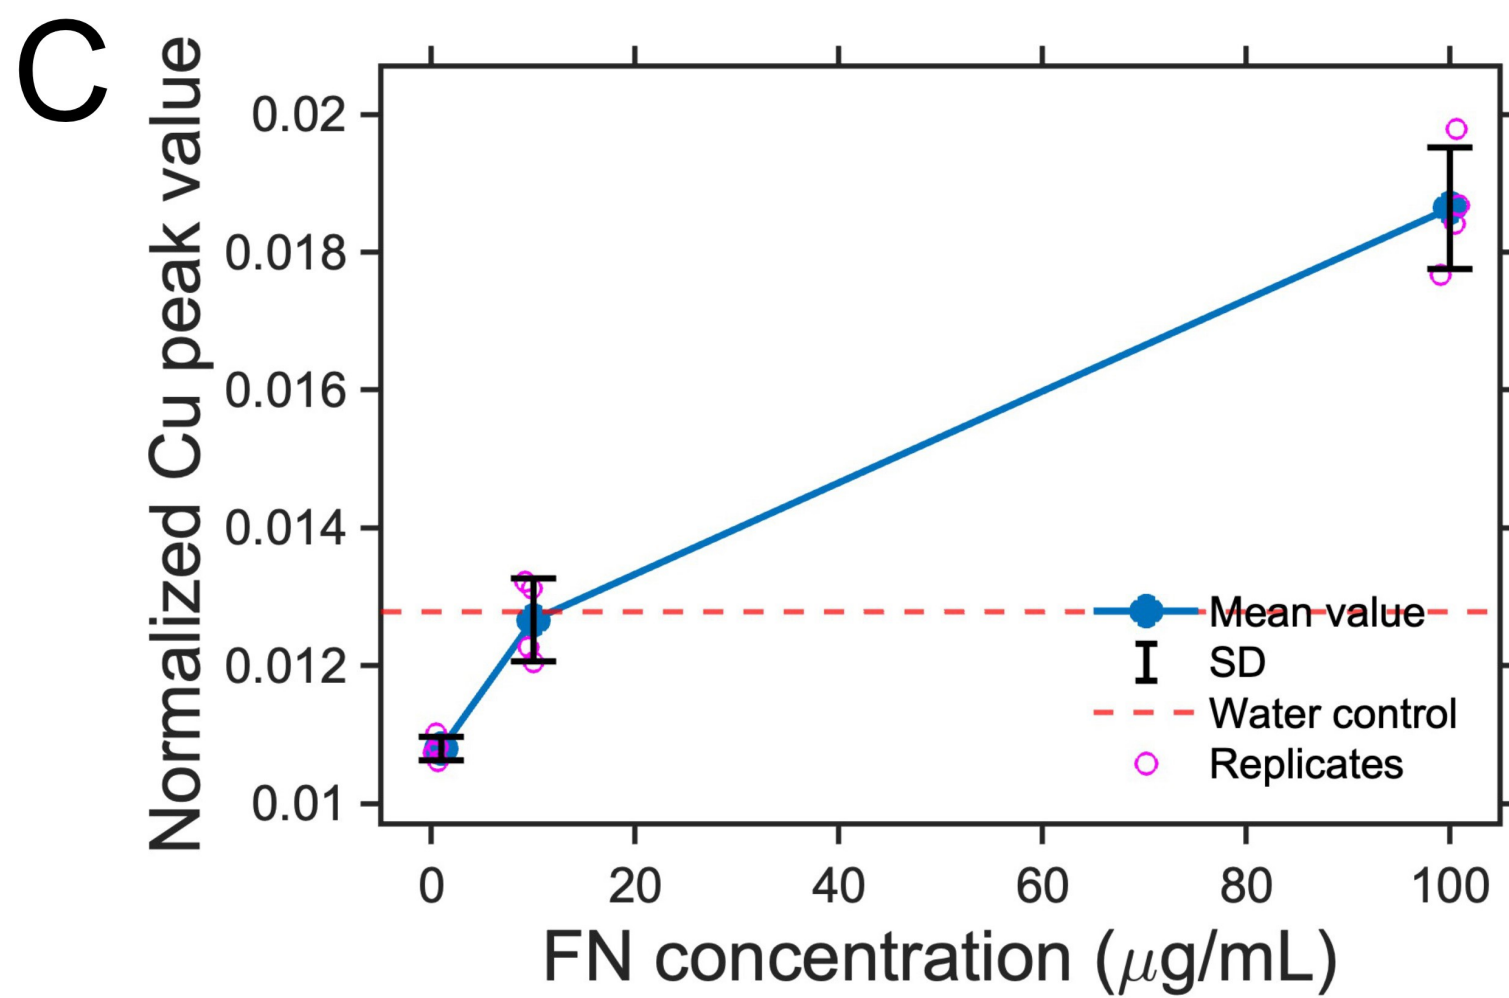

Supplement: d5an00962f3.pdf [file d5an00962f3.pdf]
